# Supplementary material
Source: PubMed Central journal article supplement (PMC524831)

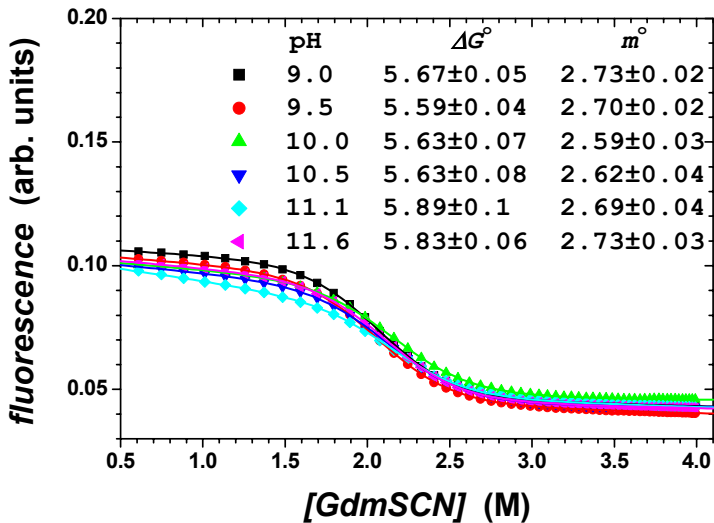

Supplement: pnas_101_44_15639__1.pdf [file pnas_101_44_15639__1.pdf]

**normalized peak intensity**

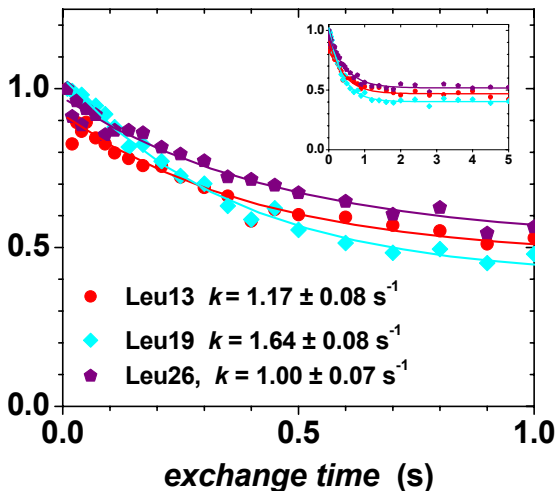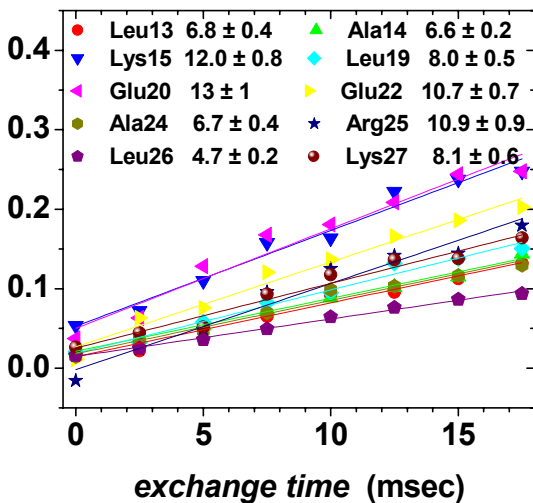

Supplement: pnas_101_44_15639__2.pdf [file pnas_101_44_15639__2.pdf]
